# Supplementary material
Source: PubMed Central journal article supplement (PMC7783336)
Supplement: AEM.01652-20-s0001.pdf [file AEM.01652-20-s0001.pdf]

## SUPPLEMENTAL INFORMATION

### **Annual Partitioning Patterns of Labyrinthulomycetes Reveal Their Multifaceted Role in Marine Microbial Food Webs**

Ningdong Xie<sup>1,2</sup>, Dana E. Hunt<sup>2,3</sup>, Zackary I. Johnson<sup>2,3</sup>, Yaodong He<sup>1</sup>, Guangyi Wang<sup>1,4#</sup>

<sup>1</sup>Center for Marine Environmental Ecology, School of Environmental Science and Engineering, Tianjin University, Tianjin 300072, China

<sup>2</sup>Marine Laboratory, Duke University, Beaufort NC USA

<sup>3</sup>Biology Department, Duke University, Durham NC USA

<sup>4</sup>Key Laboratory of Systems Bioengineering (Ministry of Education), Tianjin University, Tianjin 300072, China

**Running title:** Annual community structure of Labyrinthulomycetes in coastal waters

**Keywords:** Fungus-like protist; coastal ocean; time series; community structure; niche partitioning; microbial interaction

#Corresponding author:

Tel: (86) 022-8740210

Fax: (86) 0755-8740210

E-mail: [gywang@tju.edu.cn](mailto:gywang@tju.edu.cn)

**Figure S1**

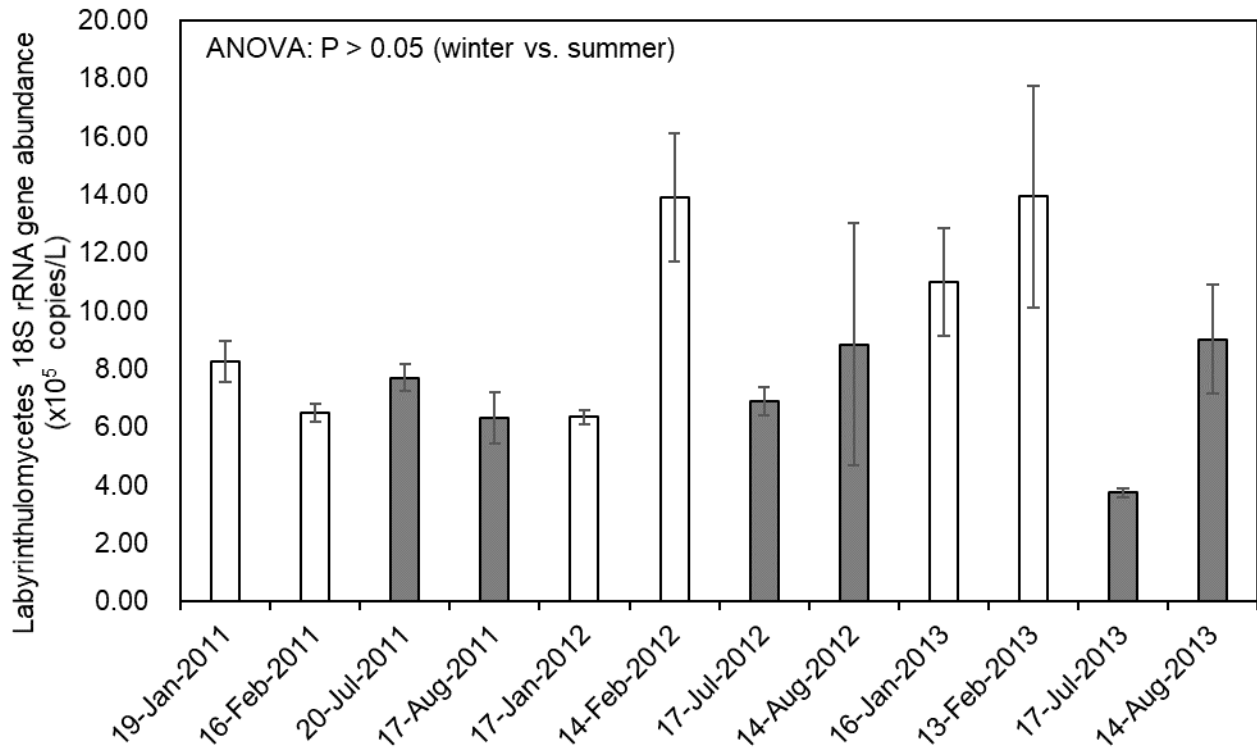

**Fig. S1.** The Labyrinthulomycetes 18S rRNA gene abundance per liter of seawater for the representative winter (mid-January and mid-February) and summer (mid-July and mid-August) samples across the time series at the Piver’s Island Coastal Observatory (PICO) from 2011 to 2013. There was no significant difference between winter and summer samples (ANOVA,  $P > 0.05$ ), shown as grey and white bars, respectively.

Figure S2

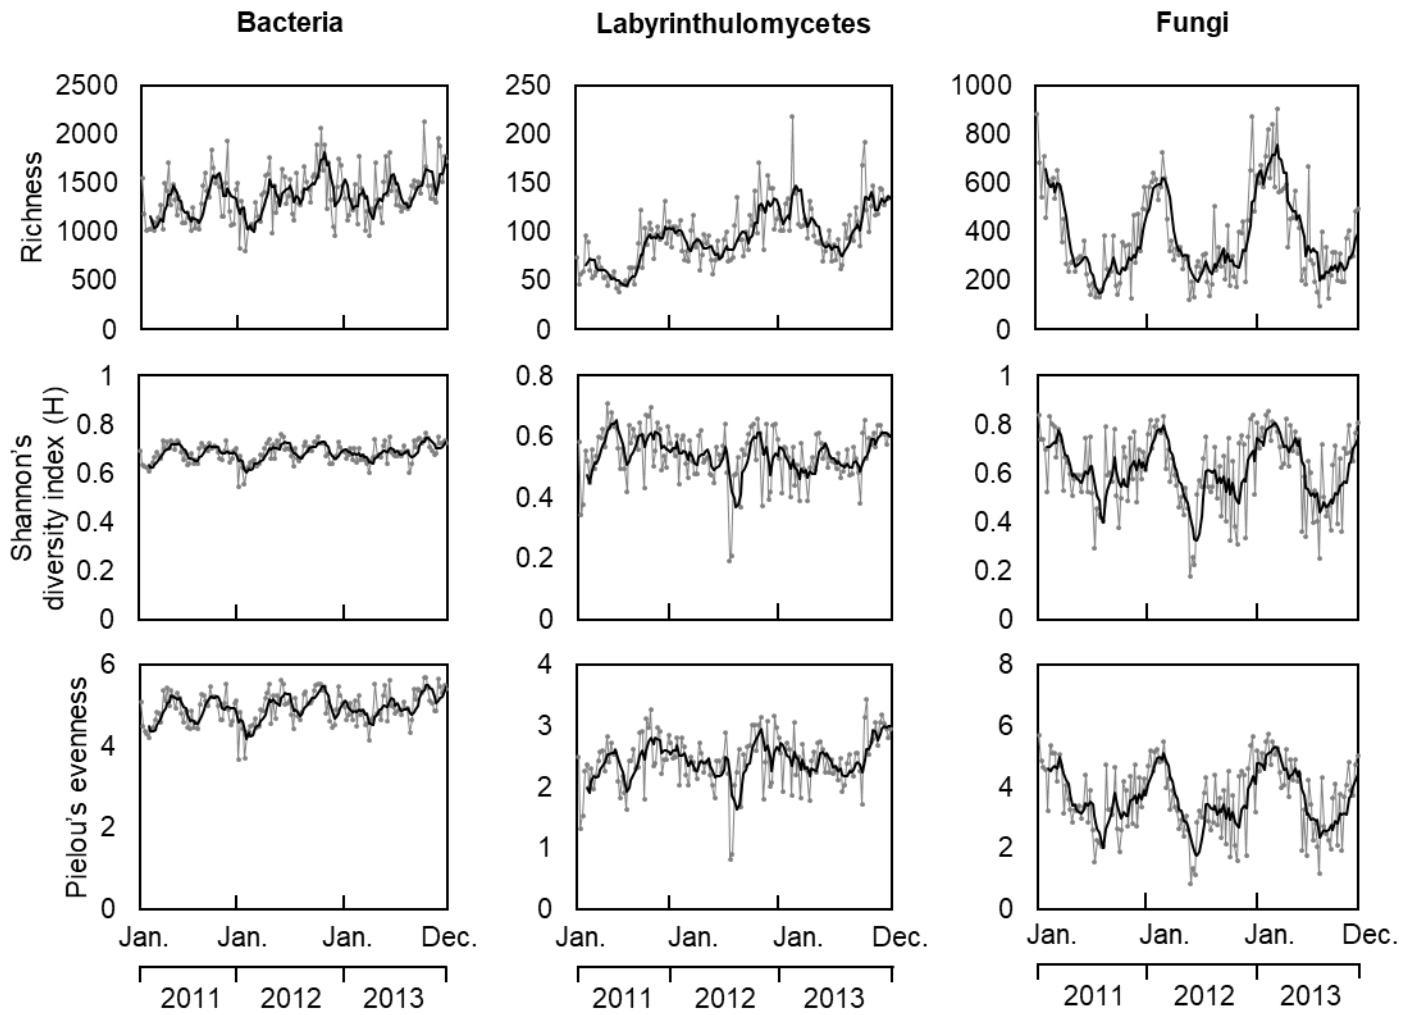

**Fig. S2.** Comparison for the  $\alpha$ -diversity measures between bacteria, fungi, and Labyrinthulomycetes across the weekly time series at Piver's Island Coastal Observatory (PICO) from 2011 to 2013, with the 5-week moving average curves plotted in bold lines.

Figure S3

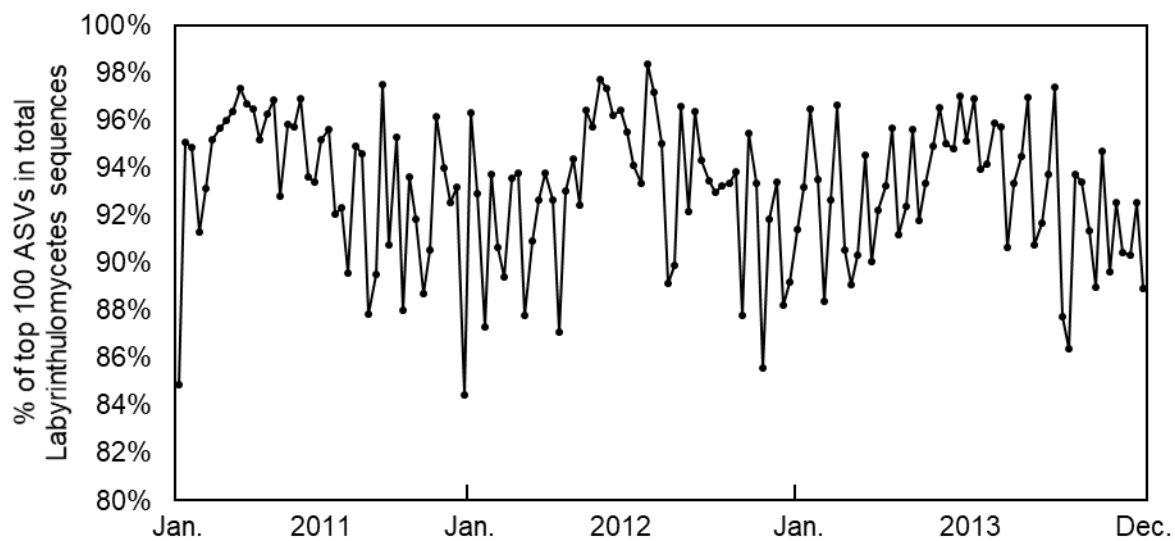

**Fig. S3.** The relative abundance of the 100 most abundant Labyrinthulomycetes 18S rRNA gene amplicon sequence variants (ASVs) in the total Labyrinthulomycetes ASV sequences across the weekly time series at the Piver's Island Coastal Observatory (PICO) from 2011 to 2013. The average percentage is 93.11%.

Figure S4

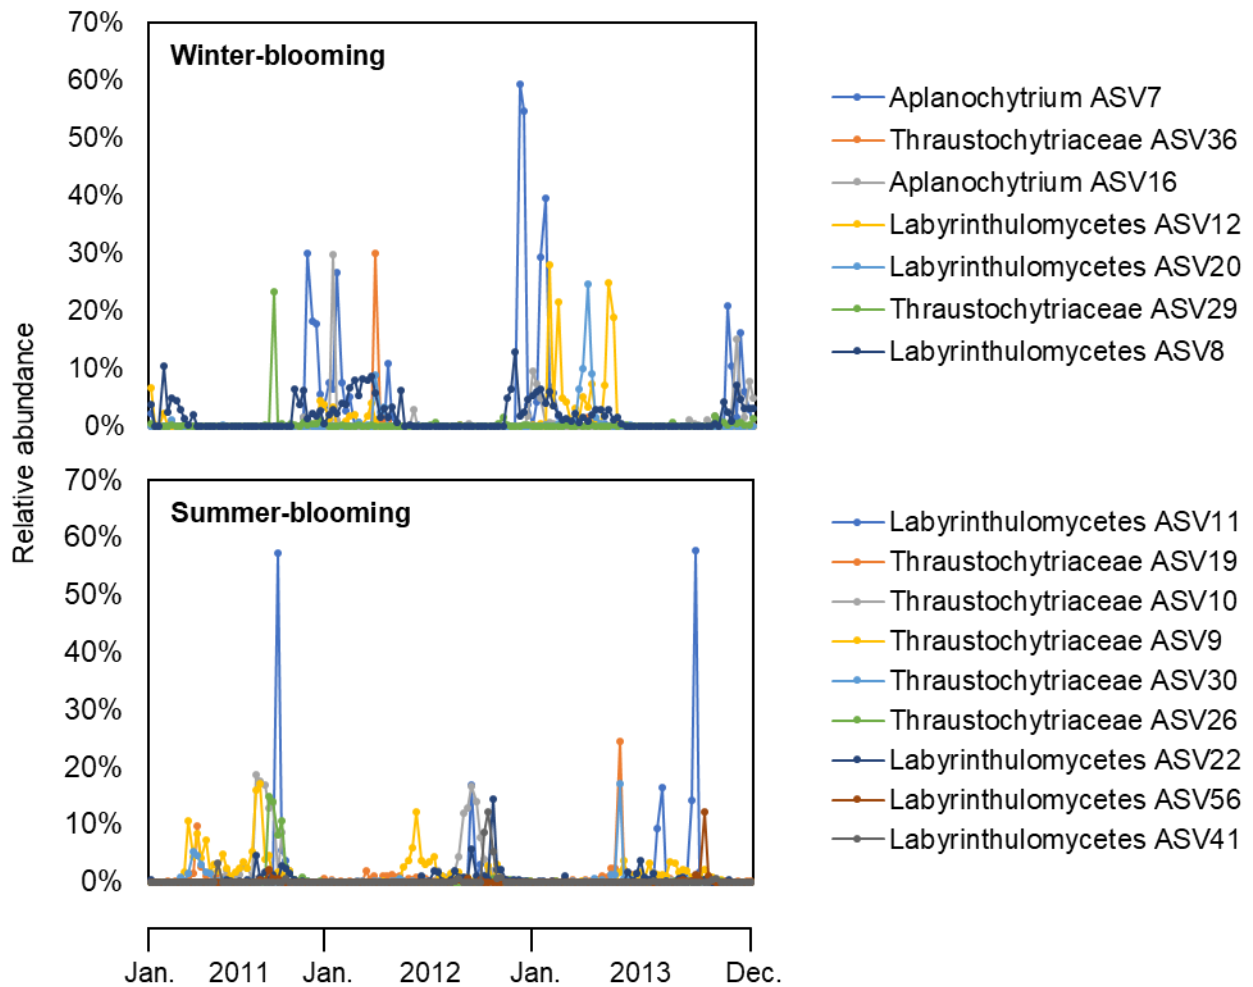

**Fig. S4.** The abundance dynamics of the winter/summer-blooming (Mfuzz cluster, see Fig. 3) Labyrinthulomycetes 18S rRNA gene amplicon sequence variants (ASVs) across the weekly time series at Piver's Island Coastal Observatory (PICO) from 2011 to 2013. Unlike the persistent ASVs with seasonal preferences (see Fig. S5), the dynamic of the ASVs shown here were dominated by transient blooms. Only ASVs with a maximum relative abundance >10% were plotted as representatives.

Figure S5

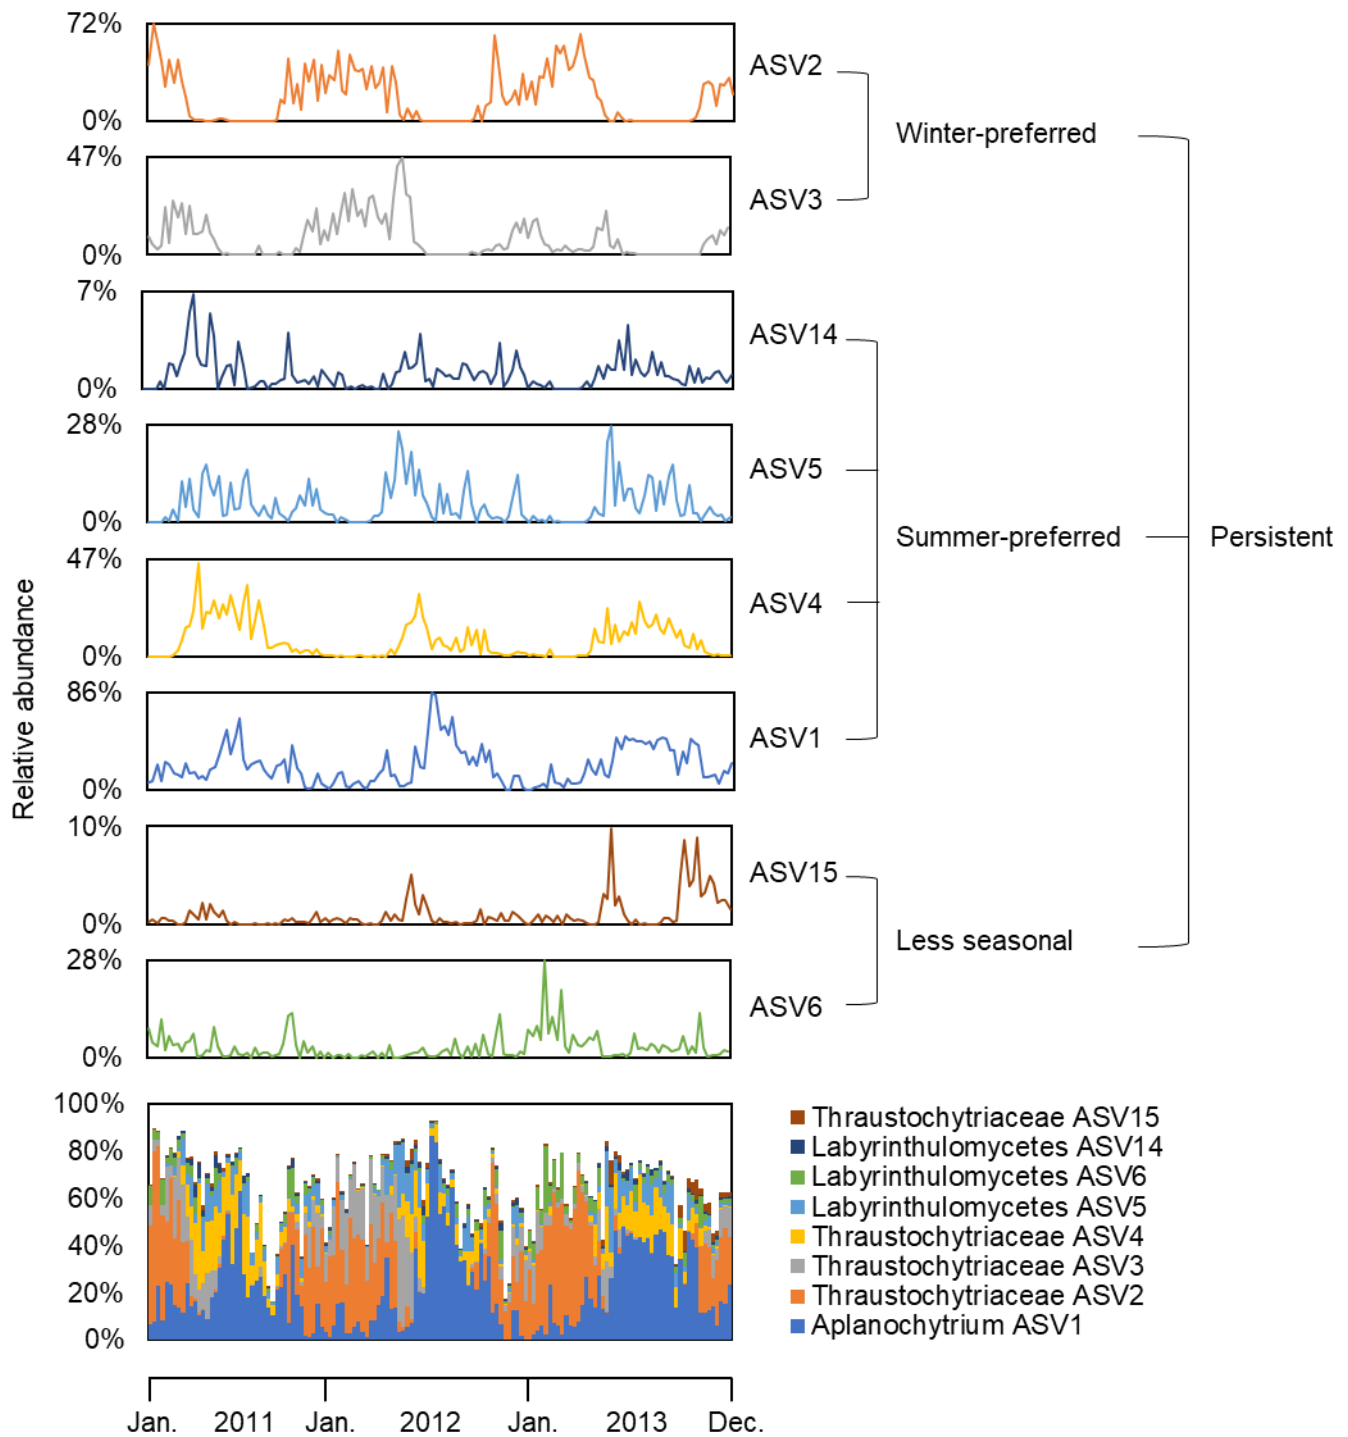

**Fig. S5.** The abundance dynamics and seasonal preferences of the 8 persistent (Mfuzz cluster, see Fig. 3) Labyrinthulomycetes 18S rRNA gene amplicon sequence variants (ASVs) across the weekly time series at the Piver's Island Coastal Observatory (PICO) from 2011 to 2013.

Figure S6

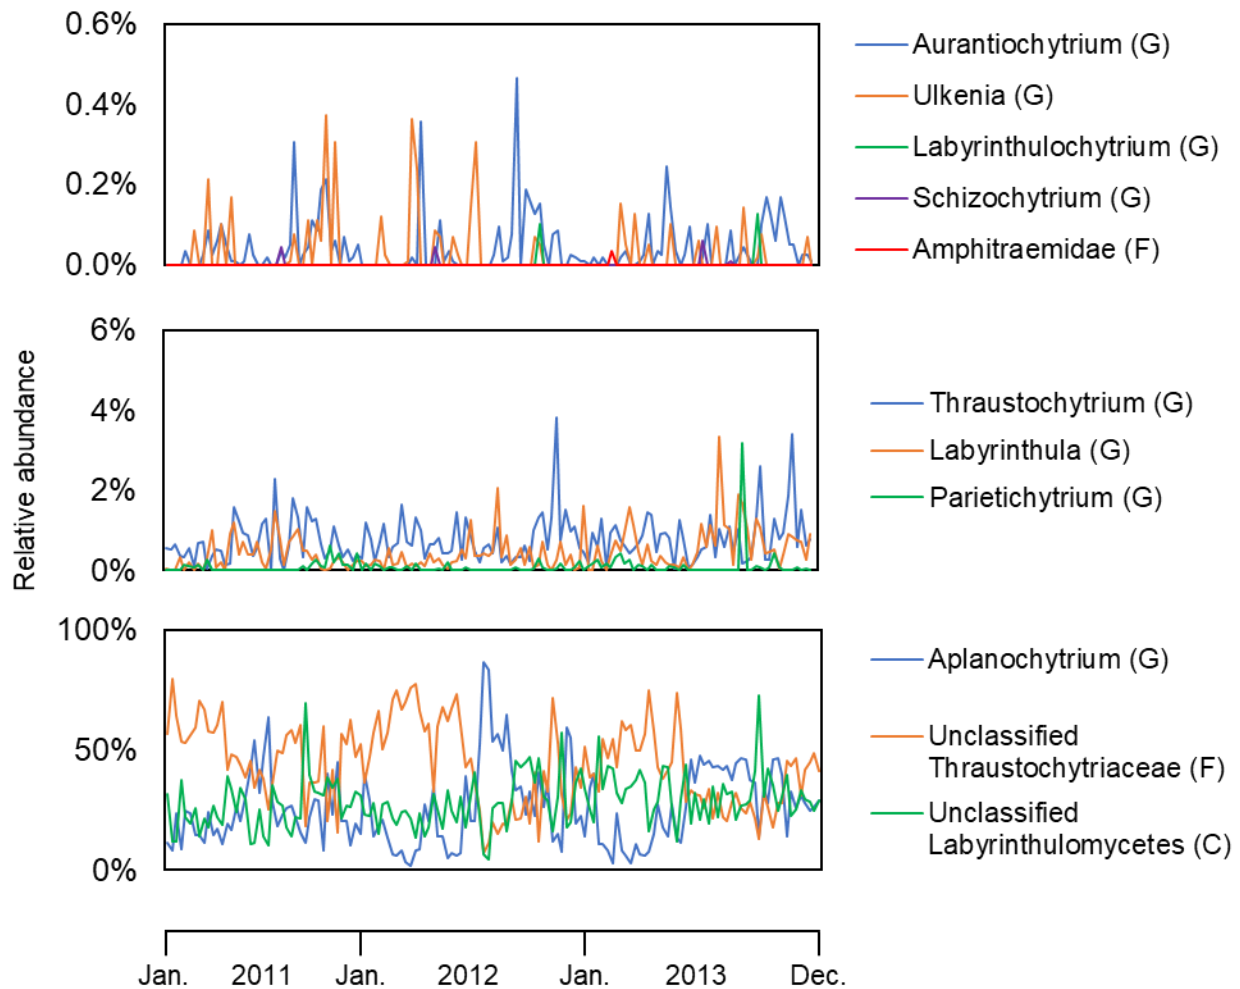

**Fig. S6.** The relative abundance dynamics of each described genus (G), unclassified family (F), and unclassified class (C) of the Labyrinthulomycetes protists across the weekly time series at the Piver's Island Coastal Observatory (PICO) from 2011 to 2013. The genera *Aurantiochytrium*, *Ulkenia*, *Labyrinthulochytrium*, *Schizochytrium*, *Thraustochytrium*, and *Parietichytrium* belong to the family Thraustochytriaceae, also known as the thraustochytrids sensu stricto.

Figure S7

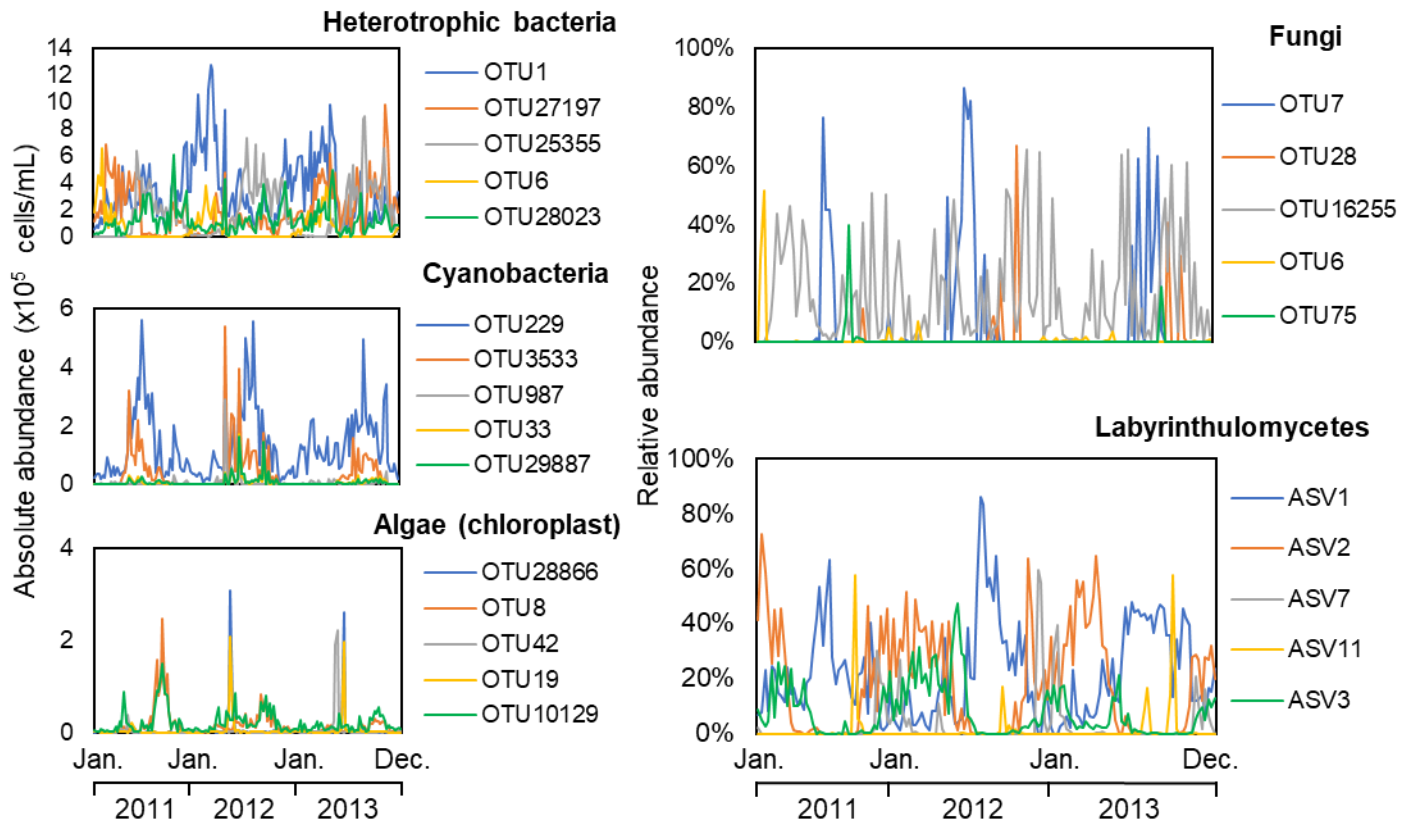

**Fig. S7.** Comparison for the typical annual patterns of heterotrophic bacteria, cyanobacteria, algae, fungi and Labyrinthulomycetes protists across the weekly time series at the Piver's Island Coastal Observatory (PICO) from 2011 to 2013. Of each group, top 5 phylotypes (OTUs or ASVs) that exhibited the highest maximum abundance across the time series were plotted by their absolute (heterotrophic bacteria, cyanobacteria, and algae) or relative (fungi and Labyrinthulomycetes) abundances.



Figure S8

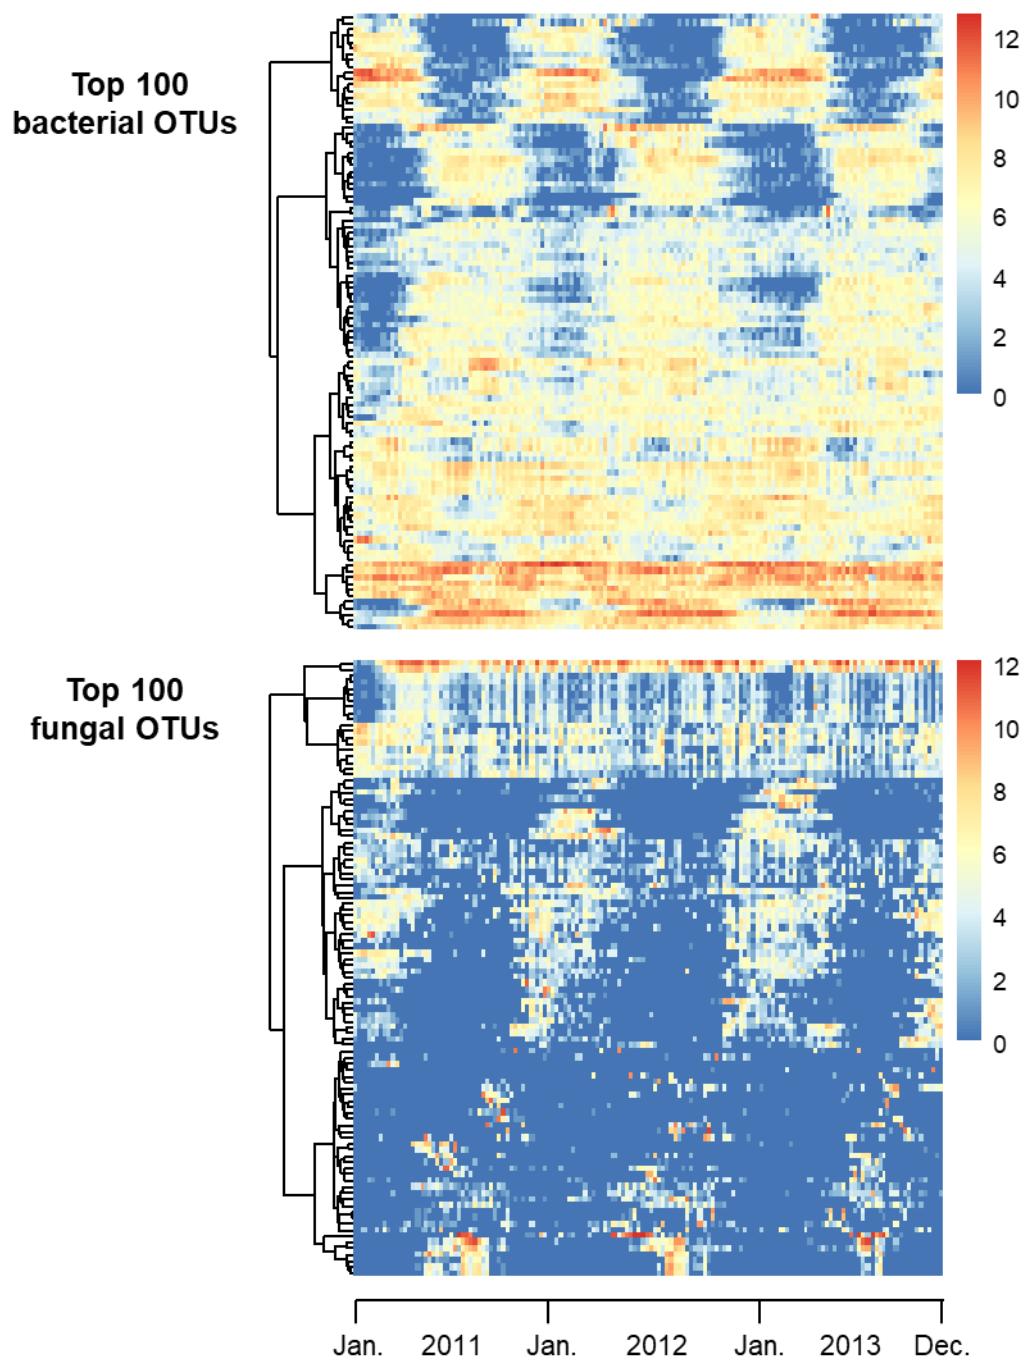

**Fig. S8.** The heatmaps for the relative abundances of the 100 most abundant bacterial OTUs and 100 most abundant fungal OTUs across the weekly time series at the Piver's Island Coastal Observatory (PICO) from 2011 to 2013. The abundance data were rarified and log-2 transformed. The OTUs were clustered by Ward's minimum variance method.

**Table S1**

Pearson correlations (R-values) between the environmental parameters and Labyrinthulomycetes 18S rRNA gene amplicon sequence variants (ASV) richness, Shannon's diversity, Pielou's evenness, and total abundance (copies number per liter seawater) at the Piver's Island Coastal Observatory (PICO).

|                            | Richness<br>(N=143) | Shannon's diversity<br>(N=143) | Pielou's evenness<br>(N=143) | Total abundance<br>(N=12) |
|----------------------------|---------------------|--------------------------------|------------------------------|---------------------------|
| Fungal abundance           | <b>0.366**</b>      | <b>0.275**</b>                 | 0.120                        | 0.092                     |
| Bacterial abundance        | <b>-0.174</b>       | <b>-0.231*</b>                 | -0.156                       | -0.490                    |
| Insolation                 | <b>-0.536**</b>     | <b>-0.358**</b>                | -0.131                       | -0.446                    |
| Temperature                | <b>-0.454**</b>     | <b>-0.222*</b>                 | -0.018                       | -0.445                    |
| Mean lower low water       | 0.159               | <b>0.210</b>                   | 0.164                        | 0.408                     |
| Salinity                   | <b>-0.433**</b>     | -0.094                         | 0.121                        | -0.346                    |
| Oxygen Saturation          | <b>-0.394**</b>     | -0.148                         | 0.030                        | <b>-0.611</b>             |
| pH                         | <b>-0.483**</b>     | -0.082                         | 0.163                        | -0.515                    |
| Dissolved inorganic carbon | <b>-0.385**</b>     | -0.040                         | 0.142                        | 0.062                     |
| Chlorophyll <i>a</i>       | -0.071              | -0.057                         | -0.043                       | -0.427                    |
| NH <sub>4</sub>            | <b>0.167</b>        | <b>0.185</b>                   | 0.135                        | 0.186                     |
| NO <sub>x</sub>            | 0.122               | <b>0.177</b>                   | 0.140                        | 0.083                     |
| PO <sub>4</sub>            | 0.010               | <b>0.219*</b>                  | <b>0.269*</b>                | -0.254                    |
| SiO <sub>4</sub>           | 0.067               | 0.081                          | 0.062                        | -0.322                    |

**Bold numbers** indicate the correlations are significant at  $P < 0.05$  level;

\* Correlations are significant at  $P < 0.01$  level;

\*\* Correlations are significant at  $P < 0.001$  level.

**Table S2**

Potential covariations between 100 most abundant Labyrinthulomycetes ASVs and 100 most abundant heterotrophic bacterial OTUs identified by their strong ( $|R| > 0.6$ ) pairwise Pearson correlations.

| Labyrinthulomycetes | Heterotrophic bacteria | R      | P <sup>1</sup> |
|---------------------|------------------------|--------|----------------|
| ASV1                | OTU50                  | 0.709  | 5.61E-23       |
| ASV1                | OTU8521                | 0.700  | 3.03E-22       |
| ASV1                | OTU22184               | 0.660  | 3.84E-19       |
| ASV1                | OTU88                  | 0.649  | 2.48E-18       |
| ASV1                | OTU2                   | 0.646  | 3.81E-18       |
| ASV1                | OTU66                  | 0.636  | 1.80E-17       |
| ASV1                | OTU73                  | 0.626  | 7.94E-17       |
| ASV1                | OTU57                  | 0.614  | 4.37E-16       |
| ASV1                | OTU29893               | -0.606 | 1.31E-15       |
| ASV2                | OTU22                  | 0.729  | 8.67E-25       |
| ASV2                | OTU6                   | 0.708  | 6.51E-23       |
| ASV2                | OTU8615                | 0.676  | 2.51E-20       |
| ASV2                | OTU13                  | 0.641  | 8.10E-18       |
| ASV2                | OTU4011                | 0.632  | 3.12E-17       |
| ASV2                | OTU32                  | 0.627  | 7.11E-17       |
| ASV2                | OTU40                  | 0.620  | 1.79E-16       |
| ASV2                | OTU18                  | 0.619  | 2.10E-16       |
| ASV2                | OTU22703               | 0.604  | 1.74E-15       |
| ASV2                | OTU92                  | -0.603 | 2.15E-15       |
| ASV2                | OTU86                  | -0.607 | 1.22E-15       |
| ASV2                | OTU88                  | -0.611 | 6.49E-16       |
| ASV2                | OTU79                  | -0.613 | 5.39E-16       |
| ASV2                | OTU9                   | -0.625 | 9.93E-17       |
| ASV2                | OTU50                  | -0.627 | 7.23E-17       |
| ASV2                | OTU587                 | -0.637 | 1.65E-17       |
| ASV2                | OTU7                   | -0.638 | 1.25E-17       |
| ASV2                | OTU191                 | -0.638 | 1.44E-17       |
| ASV2                | OTU57                  | -0.713 | 2.49E-23       |
| ASV3                | OTU45                  | 0.638  | 1.44E-17       |
| ASV3                | OTU14                  | 0.626  | 8.10E-17       |
| ASV3                | OTU11968               | 0.602  | 2.22E-15       |
| ASV4                | OTU86                  | 0.759  | 7.27E-28       |
| ASV4                | OTU9                   | 0.668  | 1.05E-19       |
| ASV4                | OTU191                 | 0.636  | 1.79E-17       |
| ASV7                | OTU143                 | 0.609  | 8.84E-16       |
| ASV13               | OTU8521                | 0.680  | 1.42E-20       |
| ASV13               | OTU2                   | 0.631  | 3.82E-17       |
| ASV13               | OTU66                  | 0.623  | 1.27E-16       |
| ASV13               | OTU27858               | 0.612  | 6.19E-16       |
| ASV13               | OTU92                  | 0.601  | 2.81E-15       |
| ASV24               | OTU29715               | 0.659  | 5.27E-19       |
| ASV35               | OTU2                   | 0.664  | 2.15E-19       |
| ASV37               | OTU22                  | 0.641  | 9.22E-18       |
| ASV37               | OTU81                  | 0.630  | 4.71E-17       |
| ASV37               | OTU1                   | 0.629  | 5.48E-17       |
| ASV37               | OTU6                   | 0.629  | 5.00E-17       |
| ASV37               | OTU32                  | 0.615  | 4.11E-16       |
| ASV54               | OTU32                  | 0.626  | 8.21E-17       |
| ASV55               | OTU35                  | 0.655  | 9.50E-19       |
| ASV58               | OTU98                  | 0.639  | 1.14E-17       |

<sup>1</sup> P value not corrected for multiple hypothesis testing

**Table S3**

Potential covariations between 100 most abundant Labyrinthulomycetes ASVs and 100 most abundant phytoplankton (including cyanobacteria and chloroplasts) OTUs identified by their strong ( $|R| > 0.6$ ) pairwise Pearson correlations.

| Labyrinthulomycetes | Phytoplankton | R      | P <sup>1</sup> |
|---------------------|---------------|--------|----------------|
| ASV1                | OTU41         | 0.627  | 6.84E-17       |
| ASV2                | OTU27293      | -0.602 | 2.20E-15       |
| ASV4                | OTU3533       | 0.630  | 4.67E-17       |
| ASV4                | OTU28330      | 0.794  | 5.17E-32       |
| ASV4                | OTU228        | 0.741  | 6.08E-26       |
| ASV6                | OTU11985      | 0.612  | 5.53E-16       |
| ASV10               | OTU10129      | 0.641  | 8.45E-18       |
| ASV10               | OTU8          | 0.651  | 1.73E-18       |
| ASV10               | OTU4017       | 0.653  | 1.30E-18       |
| ASV10               | OTU17944      | 0.636  | 1.70E-17       |
| ASV10               | OTU10151      | 0.635  | 2.24E-17       |
| ASV10               | OTU119        | 0.612  | 5.61E-16       |
| ASV12               | OTU42         | 0.601  | 2.72E-15       |
| ASV26               | OTU10129      | 0.632  | 3.33E-17       |
| ASV26               | OTU8          | 0.746  | 1.81E-26       |
| ASV26               | OTU4017       | 0.608  | 1.02E-15       |
| ASV26               | OTU26074      | 0.849  | 1.53E-40       |
| ASV26               | OTU17944      | 0.651  | 1.70E-18       |
| ASV26               | OTU10151      | 0.717  | 1.18E-23       |
| ASV26               | OTU27801      | 0.607  | 1.23E-15       |
| ASV26               | OTU18292      | 0.672  | 5.47E-20       |
| ASV26               | OTU2696       | 0.638  | 1.45E-17       |
| ASV29               | OTU26074      | 0.643  | 6.19E-18       |
| ASV33               | OTU101        | 0.724  | 2.30E-24       |
| ASV54               | OTU38         | 0.653  | 1.33E-18       |
| ASV54               | OTU25541      | 0.927  | 1.66E-61       |
| ASV56               | OTU389        | 0.682  | 9.99E-21       |
| ASV56               | OTU23216      | 0.600  | 3.04E-15       |
| ASV63               | OTU6962       | 0.608  | 1.07E-15       |
| ASV71               | OTU34         | 0.606  | 1.39E-15       |
| ASV71               | OTU22245      | 0.626  | 7.89E-17       |
| ASV71               | OTU389        | 0.619  | 2.13E-16       |
| ASV71               | OTU23216      | 0.656  | 7.52E-19       |
| ASV94               | OTU8974       | 0.605  | 1.57E-15       |
| ASV95               | OTU987        | 0.722  | 3.94E-24       |
| ASV98               | OTU10151      | 0.600  | 2.90E-15       |

<sup>1</sup> P value not corrected for multiple hypothesis testing

**Table S4**

Potential covariations between 100 most abundant Labyrinthulomycetes ASVs and 100 most abundant fungal OTUs identified by their strong ( $|R| > 0.6$ ) pairwise Pearson correlations.

| Labyrinthulomycetes | Fungi    | R     | P <sup>1</sup> |
|---------------------|----------|-------|----------------|
| ASV6                | OTU33    | 0.688 | 1.60E-20       |
| ASV11               | OTU78    | 0.698 | 2.78E-21       |
| ASV11               | OTU99    | 0.664 | 9.24E-19       |
| ASV20               | OTU59    | 0.878 | 4.28E-45       |
| ASV20               | OTU24    | 0.743 | 2.86E-25       |
| ASV22               | OTU66    | 0.808 | 9.30E-33       |
| ASV29               | OTU72    | 0.731 | 3.33E-24       |
| ASV38               | OTU12980 | 0.714 | 1.13E-22       |
| ASV51               | OTU51    | 0.617 | 9.47E-16       |
| ASV54               | OTU23    | 0.610 | 2.65E-15       |
| ASV55               | OTU177   | 0.625 | 3.09E-16       |
| ASV59               | OTU66    | 0.849 | 3.18E-39       |
| ASV61               | OTU28    | 0.649 | 9.31E-18       |
| ASV64               | OTU41    | 0.780 | 3.04E-29       |
| ASV68               | OTU168   | 0.706 | 5.71E-22       |
| ASV76               | OTU96    | 0.623 | 4.20E-16       |
| ASV81               | OTU10058 | 0.674 | 1.74E-19       |
| ASV89               | OTU206   | 0.832 | 2.11E-36       |

<sup>1</sup> P value not corrected for multiple hypothesis testing

**Table S5**

Evaluation of Maximum Likelihood fits of 24 different nucleotide substitution models, using aligned representative and reference sequences that were prepared for the *Labyrinthulomycetes* phylogenetic analyses.

| Model    | Parameters | BIC      | AICc     | lnL      | (+I) | (+G) | R    |
|----------|------------|----------|----------|----------|------|------|------|
| GTR+G+I  | 257        | 11815.68 | 9578.302 | -4530.67 | 0.38 | 0.32 | 1.23 |
| T92+G+I  | 251        | 11819.46 | 9634.254 | -4564.72 | 0.38 | 0.33 | 1.29 |
| HKY+G+I  | 253        | 11832.37 | 9629.774 | -4560.46 | 0.38 | 0.33 | 1.3  |
| K2+G+I   | 250        | 11837.22 | 9660.707 | -4578.96 | 0.38 | 0.32 | 1.28 |
| TN93+G+I | 254        | 11843.49 | 9632.201 | -4560.66 | 0.37 | 0.33 | 1.28 |
| T92+G    | 250        | 11850.22 | 9673.71  | -4585.46 | n/a  | 0.21 | 1.28 |
| TN93+G   | 253        | 11855.93 | 9653.334 | -4572.24 | n/a  | 0.2  | 1.27 |
| GTR+G    | 256        | 11859.29 | 9630.614 | -4557.84 | n/a  | 0.21 | 1.12 |
| HKY+G    | 252        | 11861.4  | 9667.497 | -4580.33 | n/a  | 0.21 | 1.29 |
| K2+G     | 249        | 11867.56 | 9699.743 | -4599.48 | n/a  | 0.21 | 1.26 |
| JC+G+I   | 249        | 11959.85 | 9792.032 | -4645.63 | 0.36 | 0.31 | 0.5  |
| JC+G     | 248        | 11990.31 | 9831.183 | -4666.22 | n/a  | 0.21 | 0.5  |
| T92+I    | 250        | 12641.82 | 10465.3  | -4981.25 | 0.57 | n/a  | 1.13 |
| GTR+I    | 256        | 12644.34 | 10415.66 | -4950.36 | 0.57 | n/a  | 1.14 |
| HKY+I    | 252        | 12648.22 | 10454.32 | -4973.74 | 0.57 | n/a  | 1.15 |
| TN93+I   | 253        | 12654.74 | 10452.15 | -4971.64 | 0.57 | n/a  | 1.14 |
| K2+I     | 249        | 12657.05 | 10489.24 | -4994.23 | 0.57 | n/a  | 1.13 |
| JC+I     | 248        | 12773.36 | 10614.24 | -5057.74 | 0.57 | n/a  | 0.5  |
| GTR      | 255        | 13741.19 | 11521.2  | -5504.15 | n/a  | n/a  | 1.09 |
| TN93     | 252        | 13749.4  | 11555.5  | -5524.33 | n/a  | n/a  | 1.09 |
| T92      | 249        | 13759.73 | 11591.91 | -5545.57 | n/a  | n/a  | 1.08 |
| HKY      | 251        | 13764.01 | 11578.81 | -5536.99 | n/a  | n/a  | 1.08 |
| K2       | 248        | 13774.63 | 11615.5  | -5558.38 | n/a  | n/a  | 1.08 |
| JC       | 247        | 13885.49 | 11735.06 | -5619.17 | n/a  | n/a  | 0.5  |

Models with the lowest BIC scores (Bayesian Information Criterion) are considered to describe the substitution pattern the best. For each model, AICc value (Akaike Information Criterion, corrected), Maximum Likelihood value (lnL), and the number of parameters (including branch lengths) are also presented. Non-uniformity of evolutionary rates among sites may be modeled by using a discrete Gamma distribution (+G) with 5 rate categories and by assuming that a certain fraction of sites are evolutionarily invariable (+I). Whenever applicable, estimates of gamma shape parameter and/or the estimated fraction of invariant sites are shown. Assumed or estimated values of transition/transversion bias (R) are shown for each model, as well. For estimating ML values, a tree topology was automatically computed. The analysis involved 125 nucleotide sequences. All positions with less than 95% site coverage were eliminated. There were a total of 362 positions in the final dataset. Evolutionary analyses were conducted in MEGA7. Abbreviations: GTR: General Time Reversible; HKY: Hasegawa-Kishino-Yano; TN93: Tamura-Nei; T92: Tamura 3-parameter; K2: Kimura 2-parameter; JC: Jukes-Cantor.
